# Supplementary material for: Construction of a novel ratiometric near-infrared fluorescent probe for SO2 derivatives and its application for biological imaging
Source: Royal Society of Chemistry journal article supplement (doi:10.1039/c7ay01113j), 2017-01-01
Supplement: c7ay01113j1.pdf [file c7ay01113j1.pdf]

Supporting information for

**Construction of a novel ratiometric near infrared  
fluorescent probe for SO<sub>2</sub> derivatives and its application for  
biological imaging**

Huiming Shang, Keyin Liu, Weiying Lin

Institute of Fluorescent Probes for Biological Imaging, School of Chemistry and Chemical  
Engineering, School of Materials Science and Engineering, University of Jinan, Jinan, Shandong  
250022, PR China.

E-mail: [weiyinglin2013@163.com](mailto:weiyinglin2013@163.com)

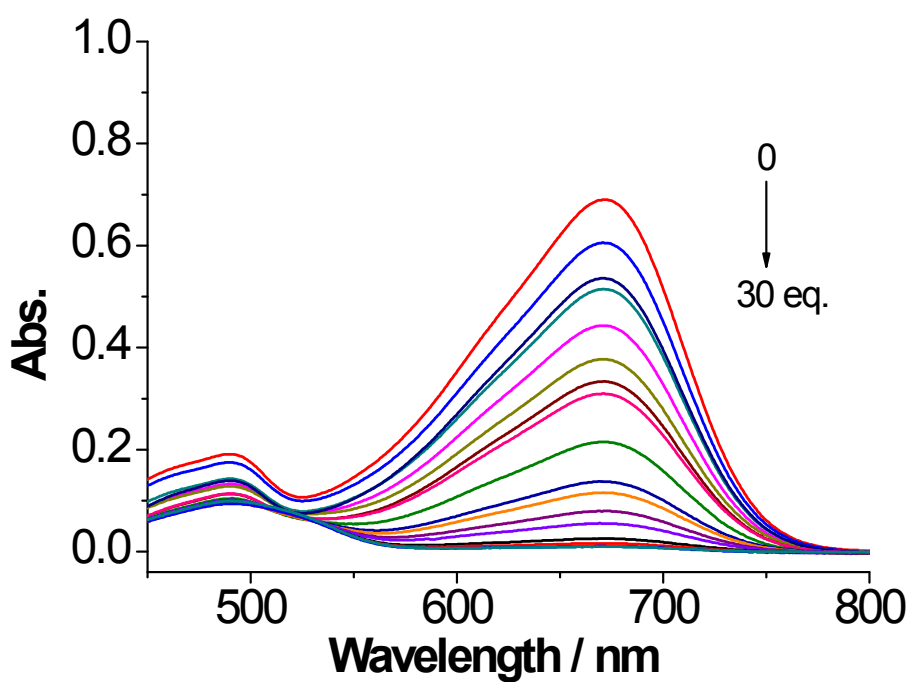

Fig. S1. The absorption spectra change of **1-SO<sub>2</sub>** titrated with SO<sub>3</sub><sup>2-</sup>. 10 μM of **1-SO<sub>2</sub>** interacted with 0 to 30 eq. of SO<sub>3</sub><sup>2-</sup> in (PBS : DMSO = 8 : 2) buffer in 1 cm cell.

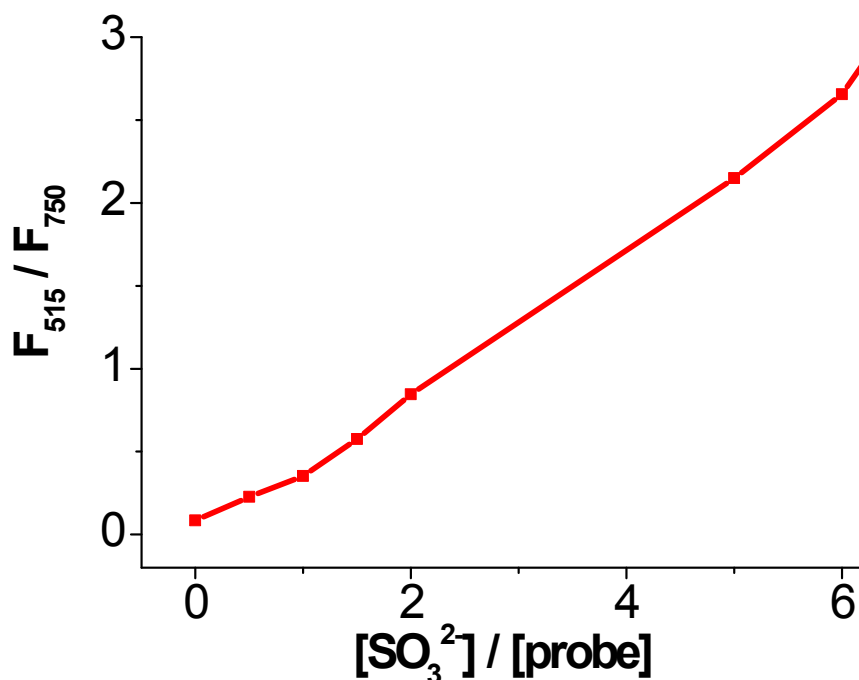

Fig. S2. The ratiometric fluorescence change when the SO<sub>3</sub><sup>2-</sup> to **1-SO<sub>2</sub>** ratio is 0 to 6, 10 μM of **1-SO<sub>2</sub>** was used. Excitation by 430 nm and 680 nm; emission monitored at 515 nm and 750 nm respectively.

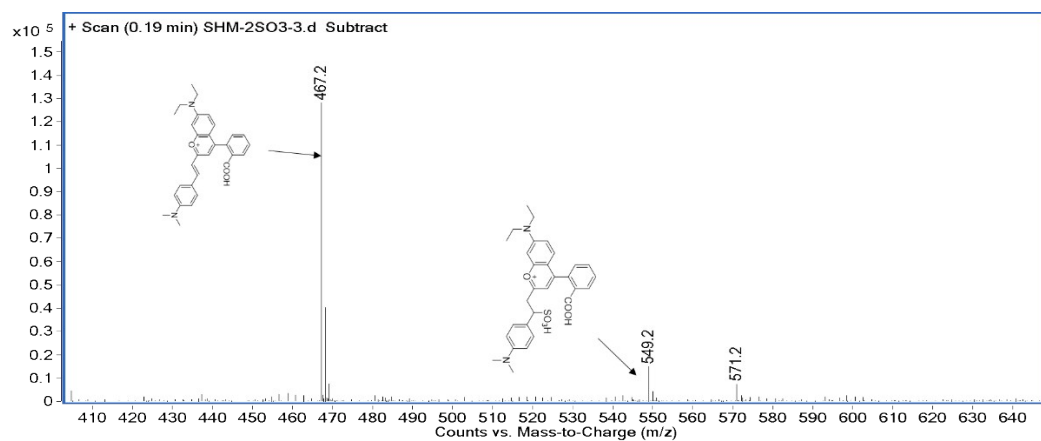

Fig. S3. High resolution mass spectrum (ESI) of the reaction mixture of the probe **1-SO<sub>2</sub>** reacted with  $\text{SO}_3^{2-}$ .

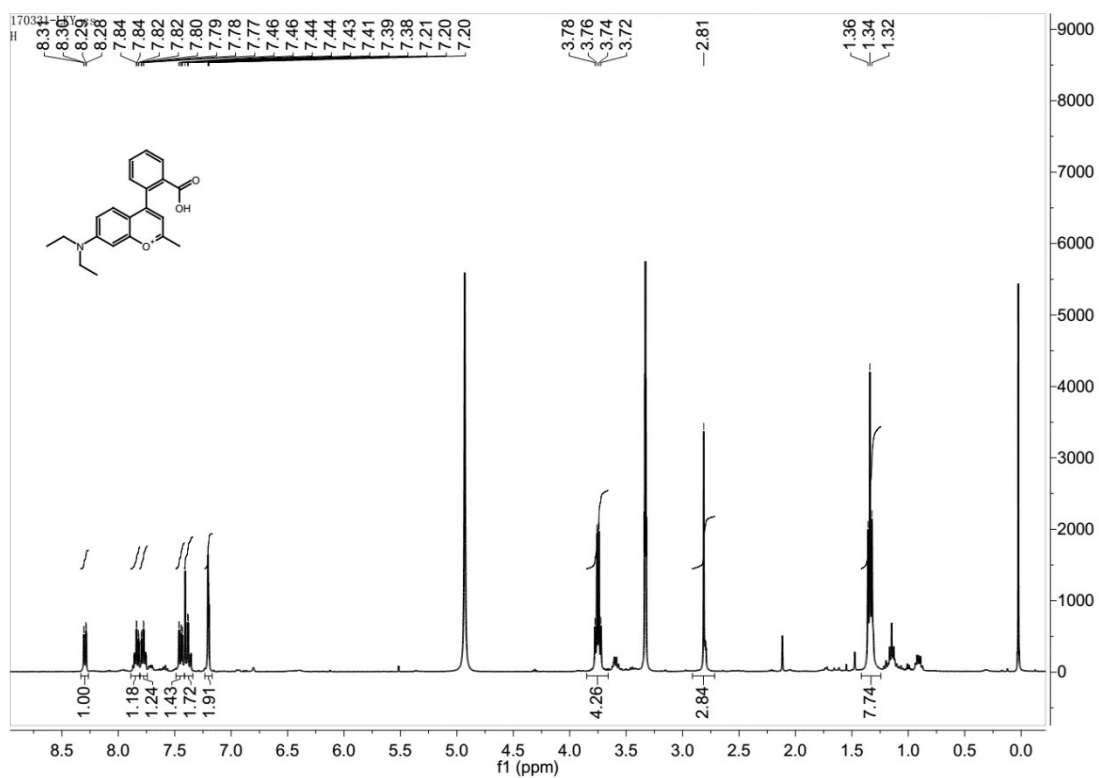

Fig. S4.  $^1\text{H}$  NMR of compound **2** in  $\text{MeOH-d}_4$ .

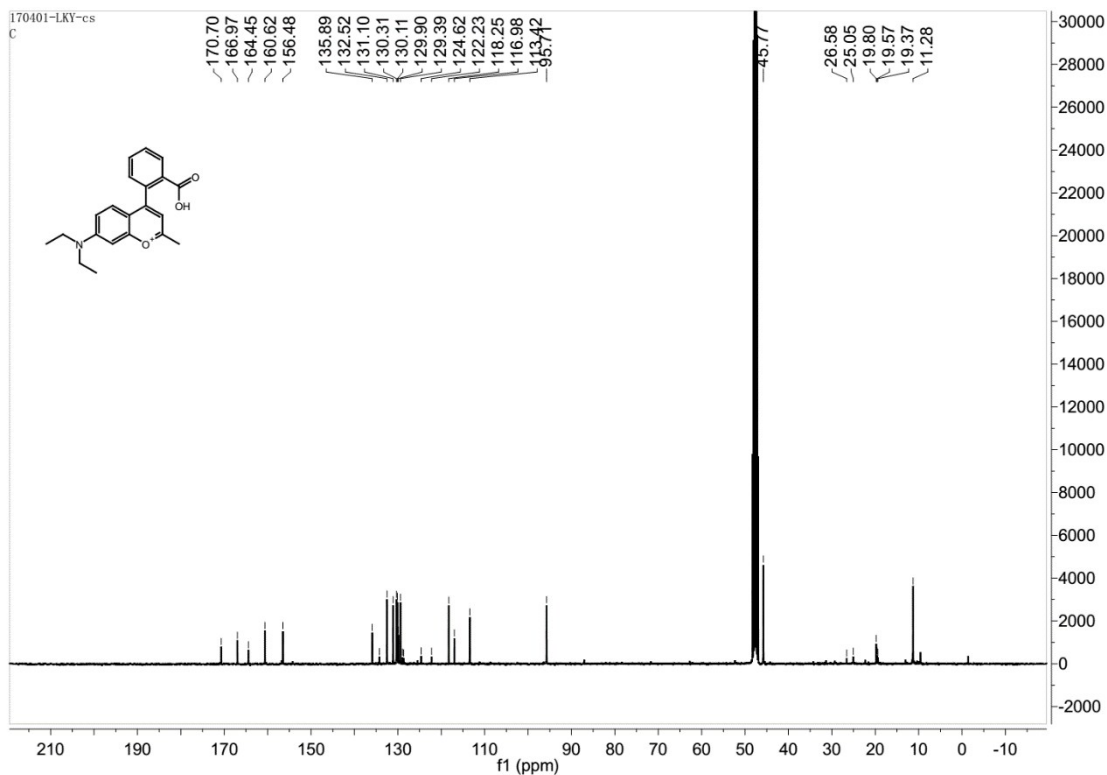

Fig. S5.  $^{13}\text{C}$  NMR of compound **2** in  $\text{MeOH-d}_4$ .

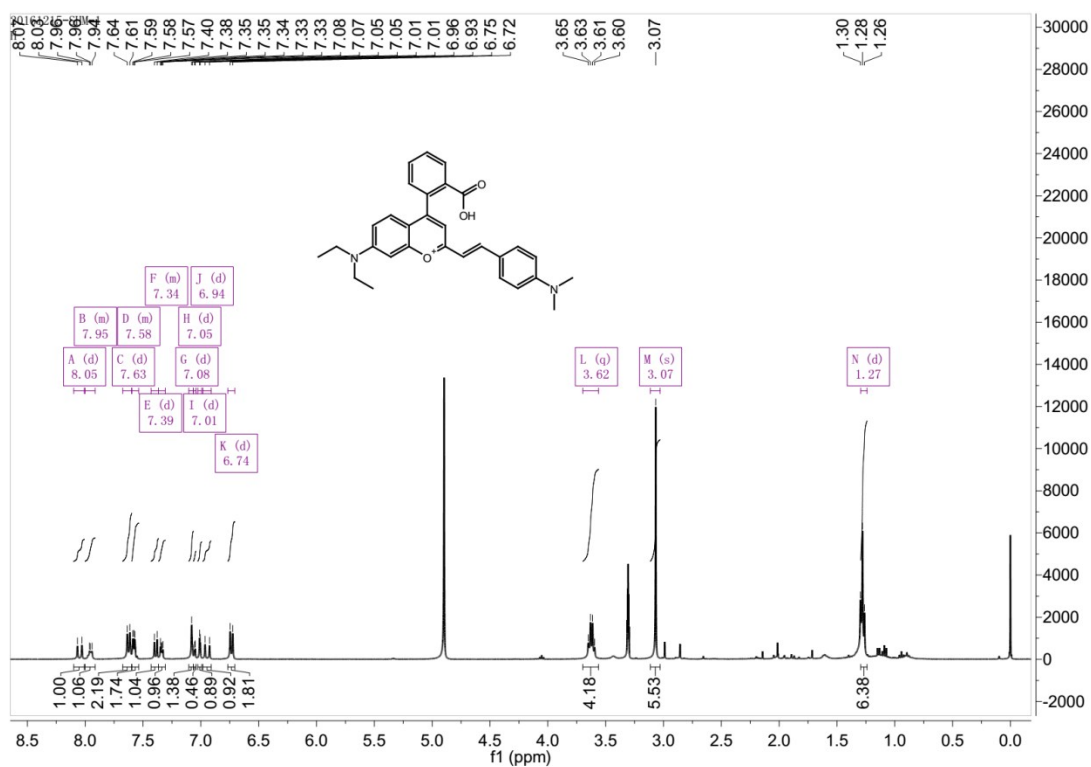

Fig. S6.  $^1\text{H}$  NMR of **1-SO<sub>2</sub>** in  $\text{MeOH-d}_4$ .

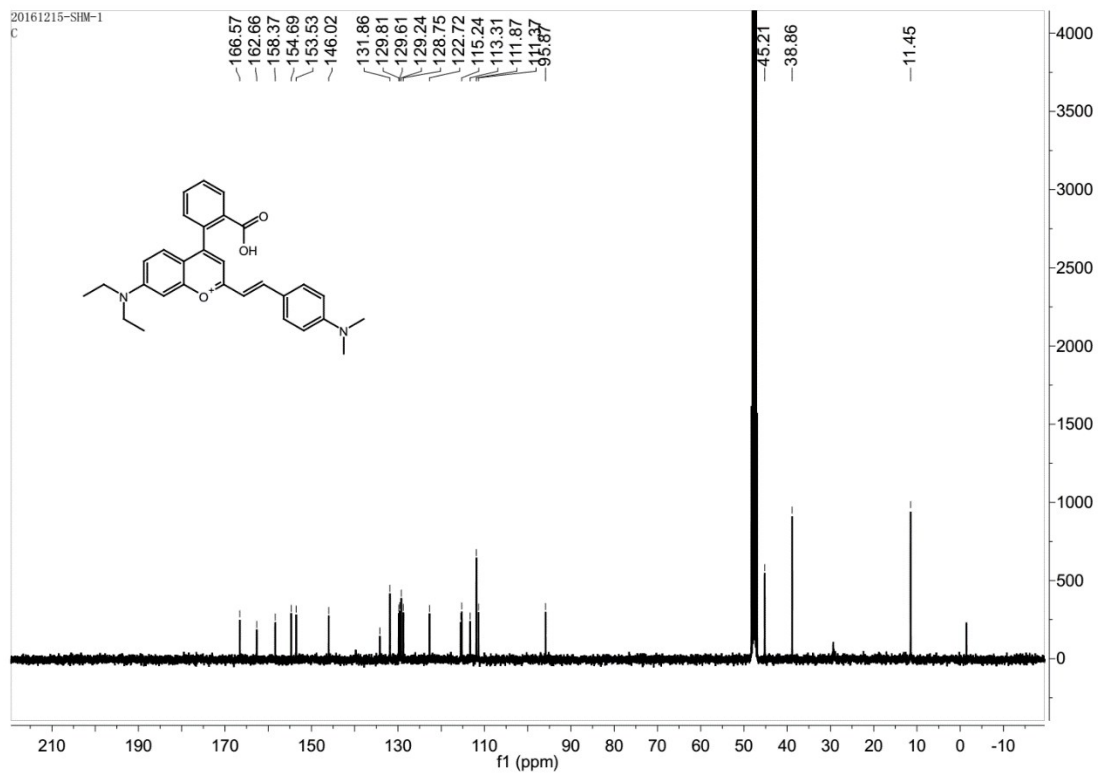

Fig. S7. <sup>13</sup>C NMR of **1-SO<sub>2</sub>** in MeOH-d<sub>4</sub>.

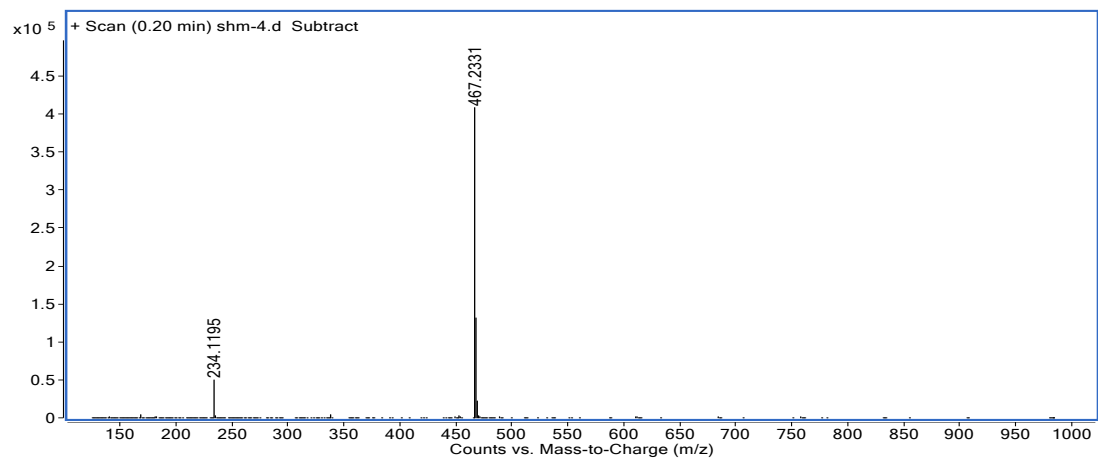

Fig. S8. HR-MS of **1-SO<sub>2</sub>**.
